# Supplementary material for: Targeted capture and pressure/temperature-responsive separation in flexible metal–organic frameworks
Source: Royal Society of Chemistry journal article supplement (doi:10.1039/c5ta00679a), 2015-01-01
Supplement: c5ta00679a1.pdf [file c5ta00679a1.pdf]

# Targeted Capture and Pressure/Temperature-Responsive Separation in Flexible Metal–Organic Frameworks

Libo Li, Yong Wang, Jiangfeng Yang, Xiaoqing Wang, and Jinping Li\*

Research Institute of Special Chemicals, Taiyuan University of Technology, Taiyuan 030024, Shanxi, P. R. China

Email: [jpli211@hotmail.com](mailto:jpli211@hotmail.com)

## Contents

|                                                                                                                                                                           |    |
|---------------------------------------------------------------------------------------------------------------------------------------------------------------------------|----|
| 1. Pelletizing process of [Cu(dhbc) <sub>2</sub> (4,4'-bipy)] and [Cu(4,4'-bipy) <sub>2</sub> (BF <sub>4</sub> ) <sub>2</sub> ] particles.....                            | 2  |
| 2. Mechanical stability and gas adsorption abilities of the two particles.....                                                                                            | 3  |
| 3. The simulation details of Monte Carlo molecular dynamic simulation.....                                                                                                | 4  |
| 4. CO <sub>2</sub> , CH <sub>4</sub> , and N <sub>2</sub> adsorption on two particles.....                                                                                | 6  |
| 5. Analysis of transient CO <sub>2</sub> /CH <sub>4</sub> and CH <sub>4</sub> /N <sub>2</sub> breakthrough experiments (R. Krishna).....                                  | 7  |
| 6. CO <sub>2</sub> /CH <sub>4</sub> separation cycling experiments on two particles.....                                                                                  | 13 |
| 7. Dynamic sorption of CO <sub>2</sub> , CH <sub>4</sub> , and N <sub>2</sub> on the two flexible MOFs.....                                                               | 14 |
| 8. H <sub>2</sub> O vapor adsorption on two particles with volume and structural changes.....                                                                             | 15 |
| 9. Structural stability of two particles heated in air, H <sub>2</sub> O, CH <sub>3</sub> CH <sub>2</sub> OH and H <sub>2</sub> O/CH <sub>3</sub> CH <sub>2</sub> OH..... | 16 |
| 10. Equimolar CO <sub>2</sub> /CH <sub>4</sub> and CH <sub>4</sub> /N <sub>2</sub> co-adsorption on two flexible MOFs at 273 K.....                                       | 17 |

## 1. Pelleting process of $[\text{Cu}(\text{dhbc})_2(4,4'\text{-bipy})]$ and $[\text{Cu}(4,4'\text{-bipy})_2(\text{BF}_4)_2]$ Particles

$[\text{Cu}(\text{dhbc})_2(4,4'\text{-bipy})]$  (Particles 1) - Particles with diameters of 200–300  $\mu\text{m}$  (Figure S1) were obtained by pressing  $[\text{Cu}(\text{dhbc})_2(4,4'\text{-bipy})]$  powder (at 3 MPa) into a solid disk, keeping pressure for 2 min, and then crushing and sieving to obtain particles of a certain size.

$[\text{Cu}(4,4'\text{-bipy})_2(\text{BF}_4)_2]$  (Particles 2) - Particles with diameters of 220–320  $\mu\text{m}$  (Figure S1) were obtained by pressing  $[\text{Cu}(4,4'\text{-bipy})_2(\text{BF}_4)_2]$  powder (at 3 MPa) into a solid disk, keeping pressure for 2 min, and then crushing and sieving to obtain particles of a certain size.

Finally, the particles were activated by flushing the adsorption bed with helium gas for 2 h at 373 K, and allowed to cool to ambient temperature.

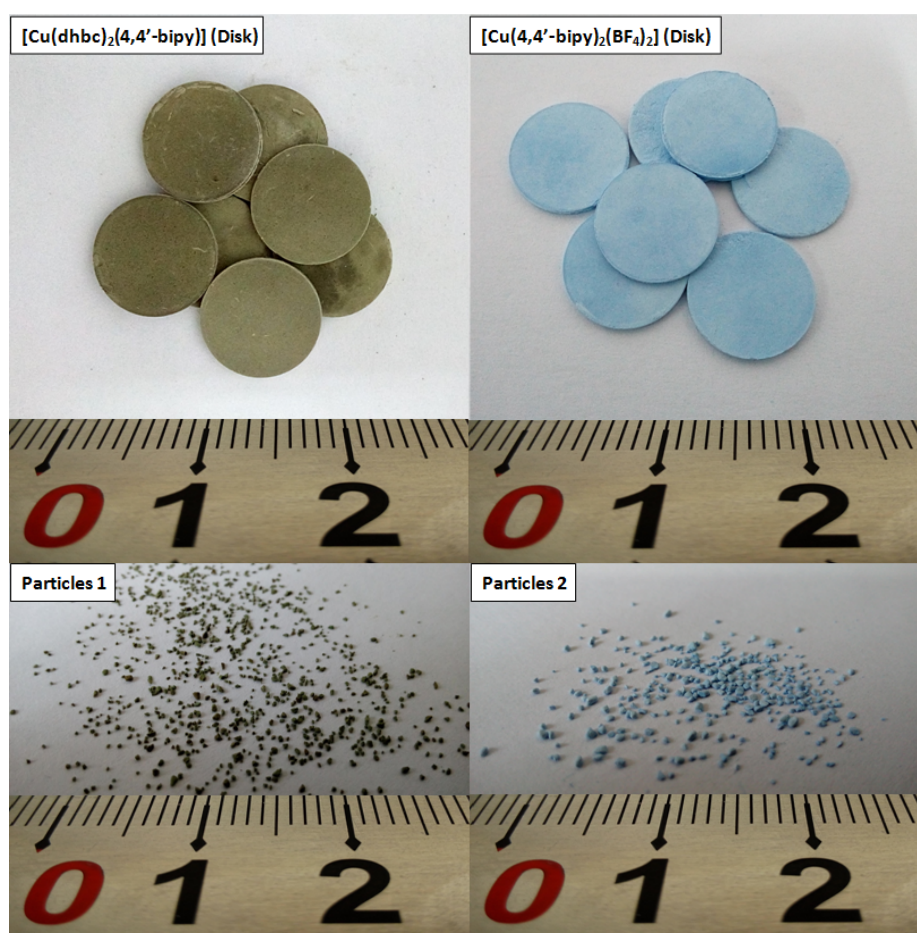

Figure S1. Pelleting process of  $[\text{Cu}(\text{dhbc})_2(4,4'\text{-bipy})]$  (deep green) and  $[\text{Cu}(4,4'\text{-bipy})_2(\text{BF}_4)_2]$  (blue) Particles.

## 2. Mechanical stability and gas adsorption abilities of the two particles

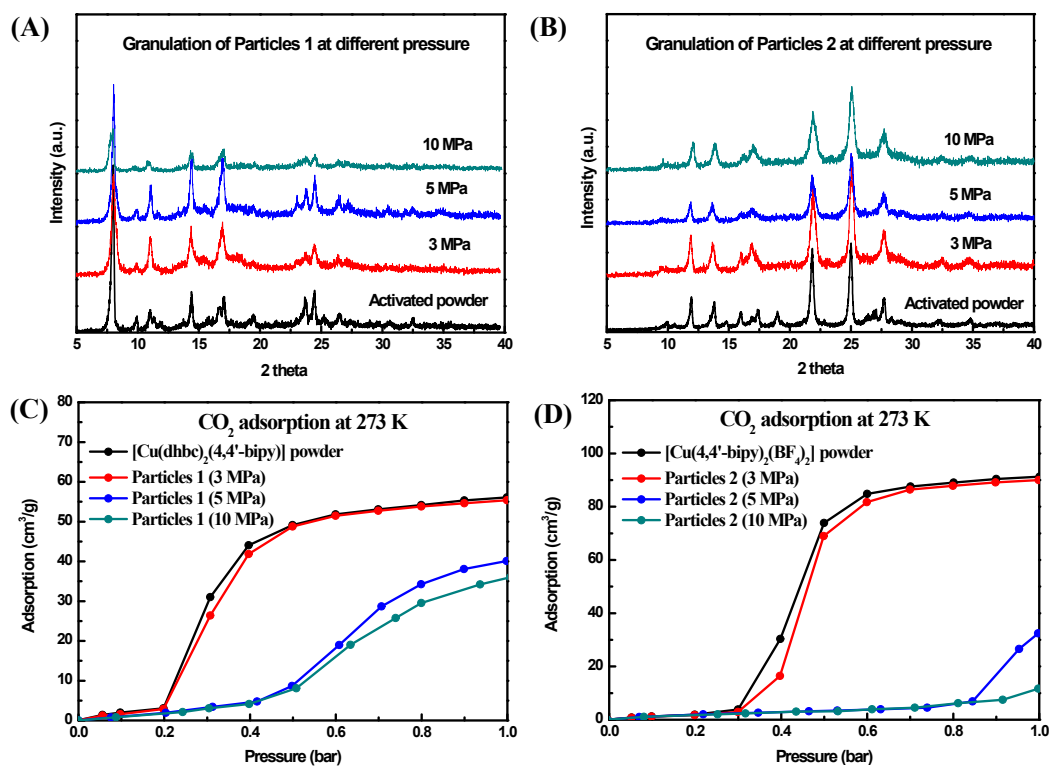

Figure S2. Mechanical stability of particles 1 and 2 at different pelleting pressure were tested by powder X-ray diffraction and  $\text{CO}_2$  adsorption at 1 bar and 273 K.

### 3. The simulation details of Monte Carlo molecular dynamic simulation

#### Force fields

The potential parameters and partial charges for all of the adsorbates are shown in Table 1. CO<sub>2</sub> was modeled as a linear molecule with three charged LJ interaction sites, one on each atom, with C–O bond length  $l = 1.149 \text{ \AA}$ , taken from the EPM2 force field developed by Harris and Yung.<sup>1</sup> CH<sub>4</sub> was modeled as a single LJ interaction site, and the potential parameters were taken from the TraPPE force field reported by Potoff and Siepmann.<sup>2</sup> N<sub>2</sub> was also represented using the TraPPE force field, with two of the three charged sites located on the respective N atoms and the third one situated at the center of mass (COM). The N–N bond length was  $1.10 \text{ \AA}$  and only the N atoms were considered as LJ interacting sites.

**Table 1** LJ potential and coulombic potential parameters for the adsorbates.

| Adsorbate       | Site               | LJ parameters        |                            |            |
|-----------------|--------------------|----------------------|----------------------------|------------|
|                 |                    | $\sigma(\text{\AA})$ | $\epsilon/k_b \text{ (K)}$ | charge (e) |
| CO <sub>2</sub> | CO <sub>2</sub> _O | 3.033                | 80.507                     | -0.3256    |
|                 | CO <sub>2</sub> _C | 2.757                | 28.129                     | 0.6512     |
| CH <sub>4</sub> | CH <sub>4</sub>    | 3.73                 | 148.0                      | 0.0        |
| N <sub>2</sub>  | N <sub>2</sub> _N  | 3.31                 | 36.0                       | -0.482     |
|                 | N <sub>2</sub> _M  | 0                    | 0                          | 0.964      |

The MOF material studied here was modeled by the atomistic representation. The LJ potential parameters for the framework atoms of the MOFs were taken from the Dreiding force field,<sup>3</sup> and the missing parameters for Cu were taken from the universal force field (UFF),<sup>4</sup> as given in Table 2. In this work, atomic partial charges for the frameworks of the MOFs were estimated using the CBAC method developed by Zhong's group, with slight variation to make the total charge equal to zero.<sup>5,6</sup>

**Table 2** LJ Potential Parameters for the Atoms in the Framework.

| LJ parameters              | Cu <sup>a</sup> | C     | O     | H    | N     | F     | B     |
|----------------------------|-----------------|-------|-------|------|-------|-------|-------|
| $\sigma(\text{\AA})$       | 3.11            | 3.47  | 3.03  | 2.85 | 3.26  | 3.09  | 3.58  |
| $\epsilon/k_b \text{ (K)}$ | 2.516           | 47.86 | 48.16 | 7.65 | 38.95 | 36.48 | 47.81 |

<sup>a</sup>) Taken from the UFF force field (it is missed in the Dreiding force field).

#### Simulation details

Grand canonical Monte Carlo (GCMC) simulation was performed to calculate the adsorption of the CO<sub>2</sub>/CH<sub>4</sub> and N<sub>2</sub>/CH<sub>4</sub> mixtures in the MOFs. The Peng–Robinson equation of state was used to convert the pressure into the corresponding fugacity used in the GCMC simulations. For [Cu(dhbc)<sub>2</sub>(4,4'-bipy)], an expanded  $4 \times 3 \times 2$

conventional cell with periodic boundary conditions was used as the simulation cell, whereas that for [Cu(4,4'-bipy)<sub>2</sub>(BF<sub>4</sub>)<sub>2</sub>] was 2×3×3. The cut-off radius was set at 12.8 Å for LJ interactions, and the long-range electrostatic interactions were handled using the Ewald summation technique with tinfoil boundary condition. For each state point, GCMC simulations consisted of 2×10<sup>7</sup> steps to ensure equilibration, followed by 2×10<sup>7</sup> steps to sample the desired thermodynamic properties.

## References

1. J. G. Harris, K. H. Yung, *J. Phys. Chem.* 1995, **99**, 12021-12024.
2. J. J. Potoff, J. I. Siepmann, *AIChE J.* 2001, **47**, 1676-1682.
3. S. L. Mayo, B. D. Olafson and W. A. Goddard, *J. Phys. Chem.* 1990, **94**, 8897-8909.
4. A. K. Rappe, C. J. Casewit, K. S. Colwell, W. A. Goddard and W. M. Skiff, *J. Am. Chem. Soc.* 1992, **114**, 10024-10035.
5. Q. Xu, C. Zhong, *J. Phys. Chem. C* 2010, **114**, 5035-5042.
6. C. Zheng, C. Zhong, *J. Phys. Chem. C* 2010, **114**, 9945-9951.

#### 4. CO<sub>2</sub>, CH<sub>4</sub>, and N<sub>2</sub> adsorption on two particles

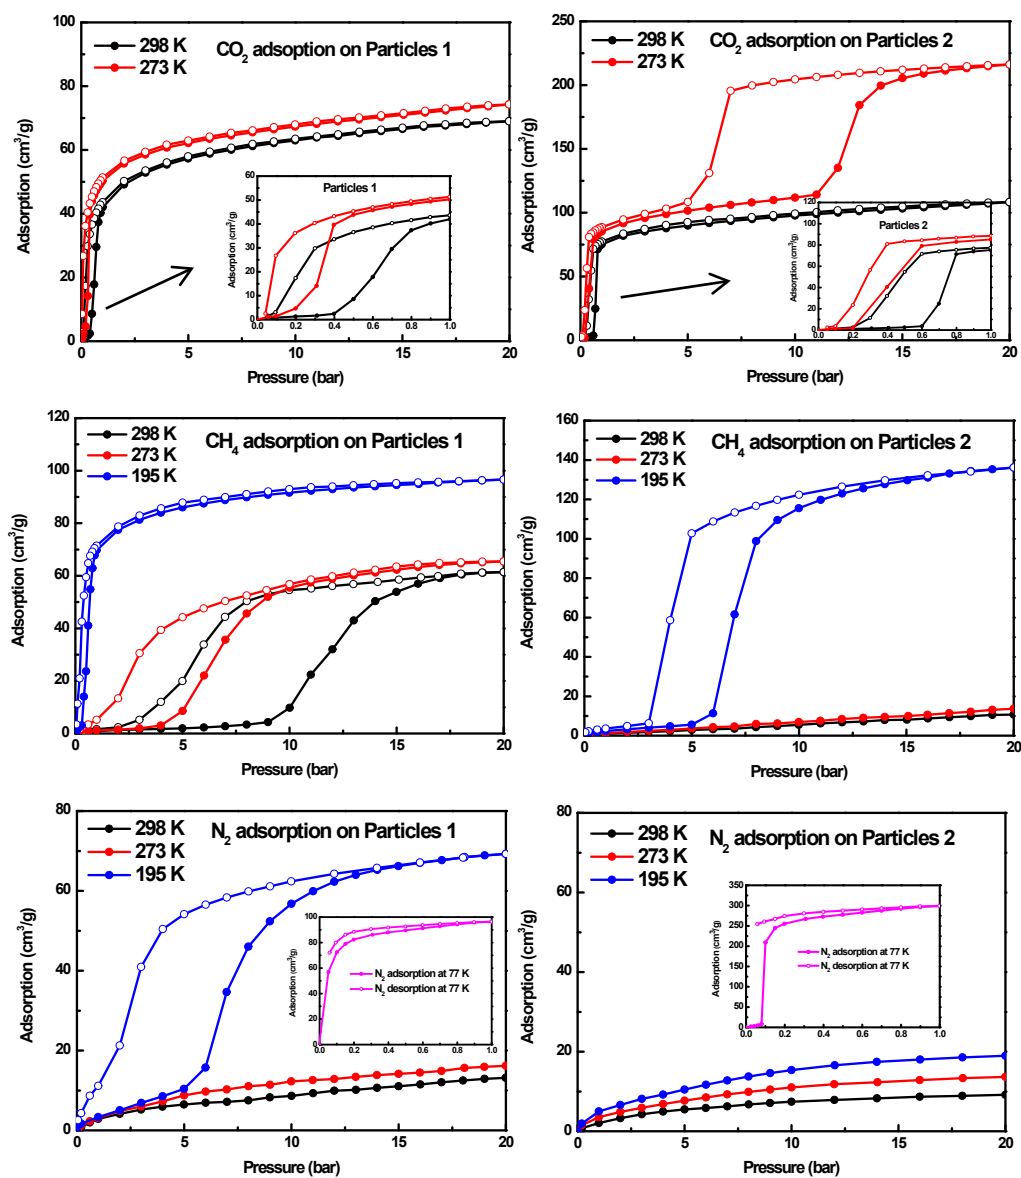

Figure S3. Equilibrium CO<sub>2</sub>, CH<sub>4</sub>, and N<sub>2</sub> adsorption (filled) and desorption (opened) isotherms of particles 1 (left) and particles 2 (right) at 298 K, 273 K, 195 K and 77 K.

## 5. Analysis of transient CO<sub>2</sub>/CH<sub>4</sub> and CH<sub>4</sub>/N<sub>2</sub> breakthrough experiments (Rajamani Krishna)

- Van 't Hoff Institute for Molecular Sciences, University of Amsterdam, Science Park 904, 1098 XH Amsterdam, The Netherlands. Email: [r.krishna@contact.uva.nl](mailto:r.krishna@contact.uva.nl)

(1) We analyze the experimental breakthroughs for separations of CO<sub>2</sub>/CH<sub>4</sub> mixtures in packed bed with [Cu(dhbc)<sub>2</sub>(4,4'-bipy)] (particles 1) and Cu(4,4'-bipy)<sub>2</sub>(BF<sub>4</sub>)<sub>2</sub> (particles 2).

Figure S4 compares the experimental breakthroughs for CO<sub>2</sub>/CH<sub>4</sub> (50%/50%) mixtures with the two MOFs at flow rates of 20 mL min<sup>-1</sup> and total pressures of 1 bar, 10 bar, and 20 bar, operating at 273 K, and 298 K.

The y-axis represents the mole fraction of CH<sub>4</sub> in the exit gas phase. In each case, it is possible to produce CH<sub>4</sub> with say 99% purity during the time interval between  $t_1$  and  $t_2$ . This is illustrated for [Cu(dhbc)<sub>2</sub>(4,4'-bipy)] (particles 1) at 20 bar in Figure S4.

A material balance for the time interval  $t = t_1 - t_2$  allows us to determine the productivity of CH<sub>4</sub> with the specified 99%+ purity

$$CH_4 \text{ productivity} = \frac{c_t Q_t}{m_{ads}} \int_{t_1}^{t_2} (y_{CH_4, exit}) dt$$

(1)

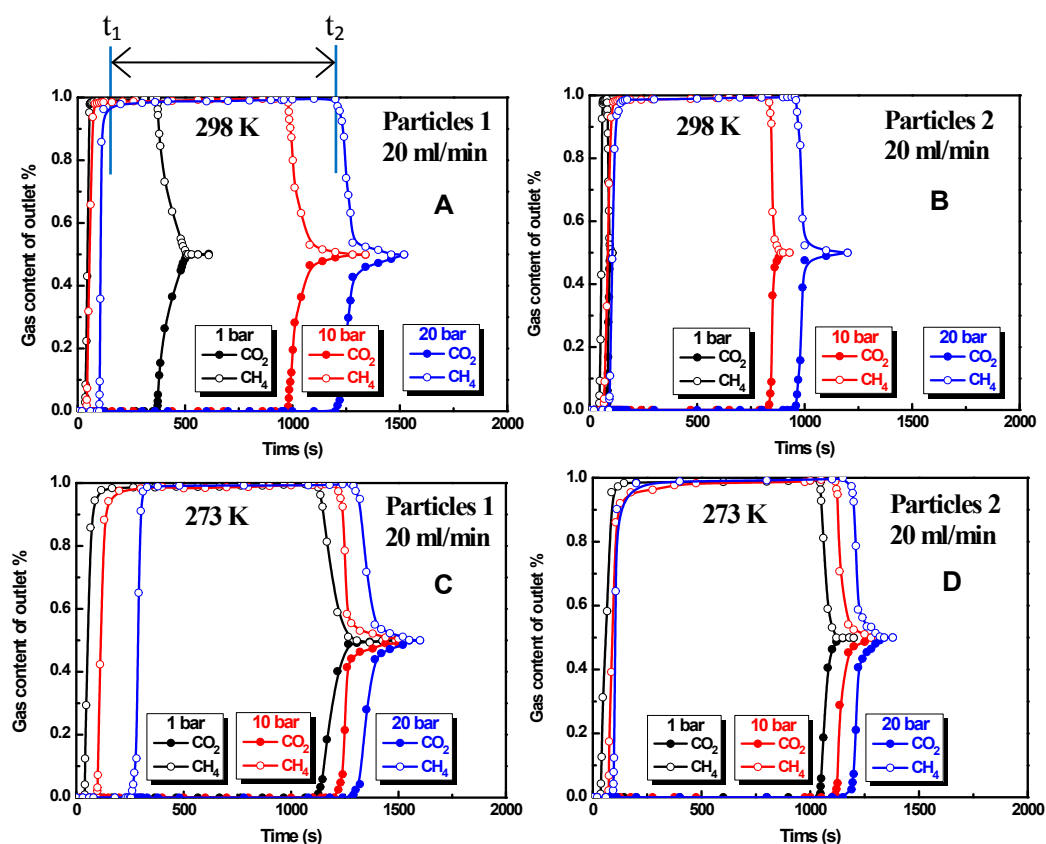

Figure S4. Experimental breakthroughs for 50/50 CO<sub>2</sub>/CH<sub>4</sub> mixtures in packed bed with [Cu(dhbc)<sub>2</sub>(4,4'-bipy)] (particles 1) and Cu(4,4'-bipy)<sub>2</sub>(BF<sub>4</sub>)<sub>2</sub> (particles 2). The y-axis represents the mole fractions of CO<sub>2</sub> and CH<sub>4</sub> in the

exit gas phase. The inlet gas is equimolar, at total pressures of 1 bar, 10, and 20 bar. As indicated for particles 1 at 298 K and 20 bar, it is possible to produce CH<sub>4</sub> with 99% purity during the time interval between  $t_1$  and  $t_2$ .

Figures S5a, and S5b present comparisons of the productivities of 99%+ pure CH<sub>4</sub> for CO<sub>2</sub>/CH<sub>4</sub> mixture breakthroughs at 273 K, and 298 K in the two MOFs. The x-axis is the total pressure.

The CO<sub>2</sub> uptake is calculated from a material balance during the time interval 0 –  $t_{final}$ , where  $t_{final}$  is the final equilibration time.

$$CO_2 \text{ uptake} = \frac{c_t Q_t}{m_{ads}} \int_0^{t_{final}} (y_{CO_2,exit} - y_{CO_2,exit}) dt \quad (2)$$

Figures S6a, S6b are plots of CO<sub>2</sub> captured per kg of MOF as a function of the total pressure.

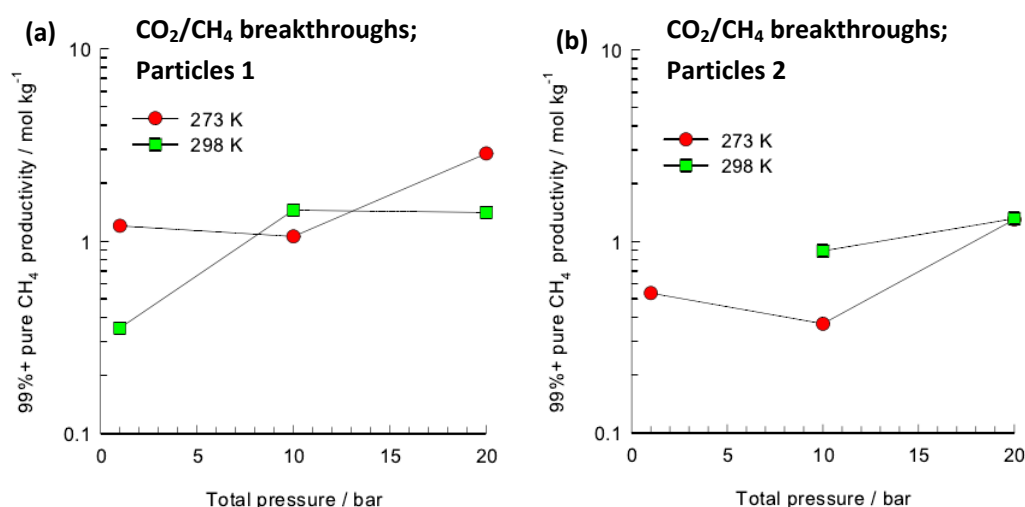

Figure S5. (a, b) Productivity of 99%+ pure CH<sub>4</sub> for CO<sub>2</sub>/CH<sub>4</sub> mixture breakthroughs with two particles at 273 K, and 298 K. The x-axis is the total operating pressure.

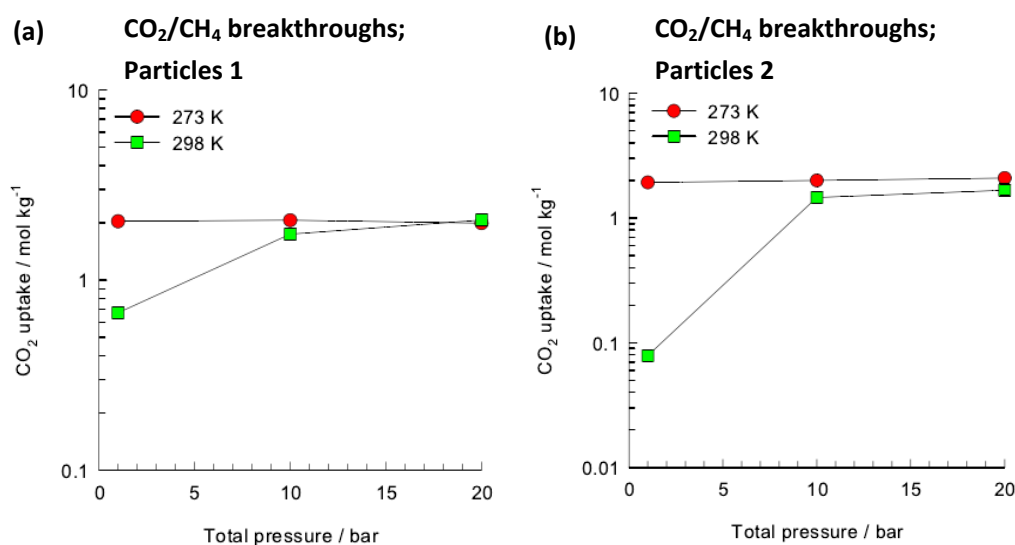

Figure S6. (a, b) CO<sub>2</sub> uptake kg of MOF, calculated from the experimental breakthroughs for CO<sub>2</sub>/CH<sub>4</sub> mixtures in packed bed with two particles.



(2) We analyze the experimental breakthroughs for separations of CO<sub>2</sub>/CH<sub>4</sub> mixtures in packed bed with two particles. Figure S7 present the data on experimental breakthroughs for 50/50 CH<sub>4</sub>/N<sub>2</sub> mixtures in packed bed with two particles. The y-axis represents the mole fractions of N<sub>2</sub> and CH<sub>4</sub> in the exit gas phase. The inlet gas is equimolar, at total pressures of 1 bar, 10, and 20 bar. As indicated for [Cu(dhbc)<sub>2</sub>(4,4'-bipy)] (particles 1) at 20 bar and 195 K, it is possible to produce N<sub>2</sub> with 90% purity during the time interval between t<sub>1</sub>, and t<sub>2</sub>. The 90% pure N<sub>2</sub> productivity is calculated from

$$N_2 \text{ productivity} = \frac{c_t Q_t}{m_{ads}} \int_{t_1}^{t_2} (y_{N_2, exit}) dt$$

(3)

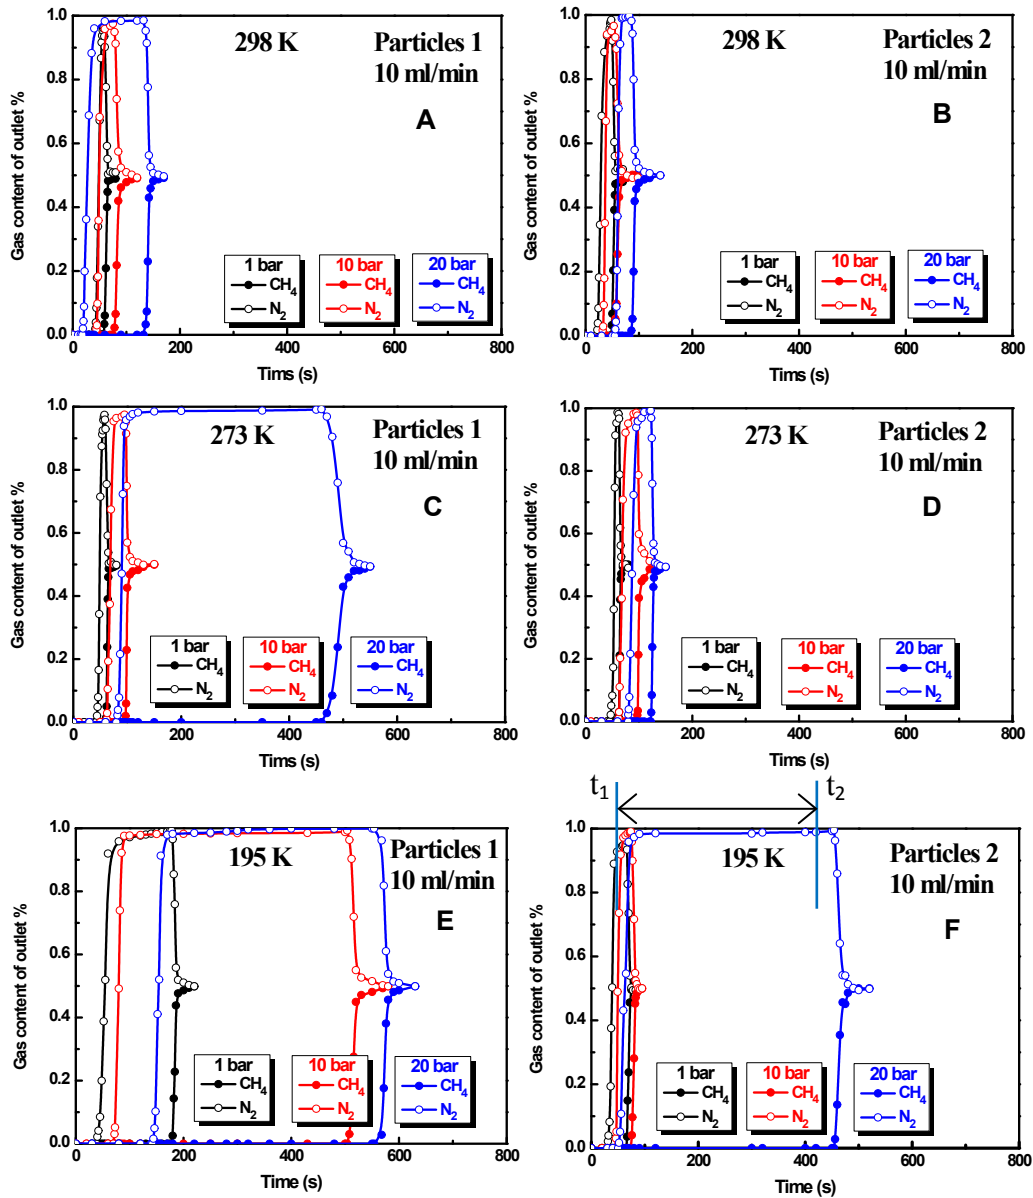

Figure S7. Experimental breakthroughs for 50/50  $\text{CH}_4/\text{N}_2$  mixtures in packed bed with  $[\text{Cu}(\text{dhbc})_2(4,4'\text{-bipy})]$  (particles 1) and  $\text{Cu}(4,4'\text{-bipy})_2(\text{BF}_4)_2$  (particles 2). The y-axis represents the mole fractions of  $\text{N}_2$  and  $\text{CH}_4$  in the exit gas phase. The inlet gas is equimolar, at total pressures of 1 bar, 10, and 20 bar. As indicated for particles 1 at 20 bar and 195 K, it is possible to produce  $\text{N}_2$  with 90% purity during the time interval between  $t_1$  and  $t_2$ .

Figures S8a, and S8b present plots of the productivity of 90%+ pure  $\text{N}_2$  from separation of  $\text{CH}_4/\text{N}_2$  mixtures with two particles at 195 K, 273 K, and 298 K. The x-axis is the total operating pressure.

The  $\text{CH}_4/\text{N}_2$  breakthrough curves also allow calculation on the  $\text{CH}_4$  uptake from a material balance during the time interval  $0 - t_{\text{final}}$ , where  $t_{\text{final}}$  is the final equilibration time.

$$\text{CH}_4 \text{ uptake} = \frac{c_t Q_t}{m_{\text{ads}}} \int_0^{t_{\text{final}}} (y_{\text{CH}_4, \text{exit}} - y_{\text{CH}_4, \text{exit}}) dt \quad (4)$$

Figures S9a, and S9b present plots of the  $\text{CH}_4$  uptake per kg of MOF, calculated from the experimental breakthroughs in packed bed with  $[\text{Cu}(\text{dhbc})_2(4,4'\text{-bipy})]$  (particles 1) and  $\text{Cu}(4,4'\text{-bipy})_2(\text{BF}_4)_2$  (particles 2).

The productivity of 90%+ pure  $N_2$  correlates with the  $CH_4$  uptake; this is demonstrated in Figure S10.

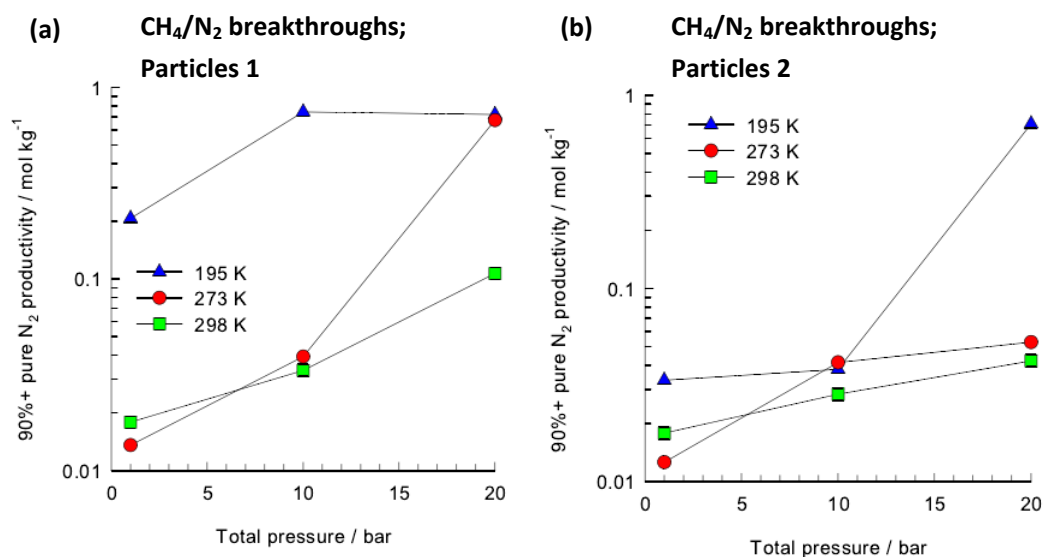

Figure S8. (a, b) Productivity of 90%+ pure  $N_2$  for  $CH_4/N_2$  mixture breakthroughs with two particles at 195 K, 273 K, and 298 K. The x-axis is the total operating pressure.

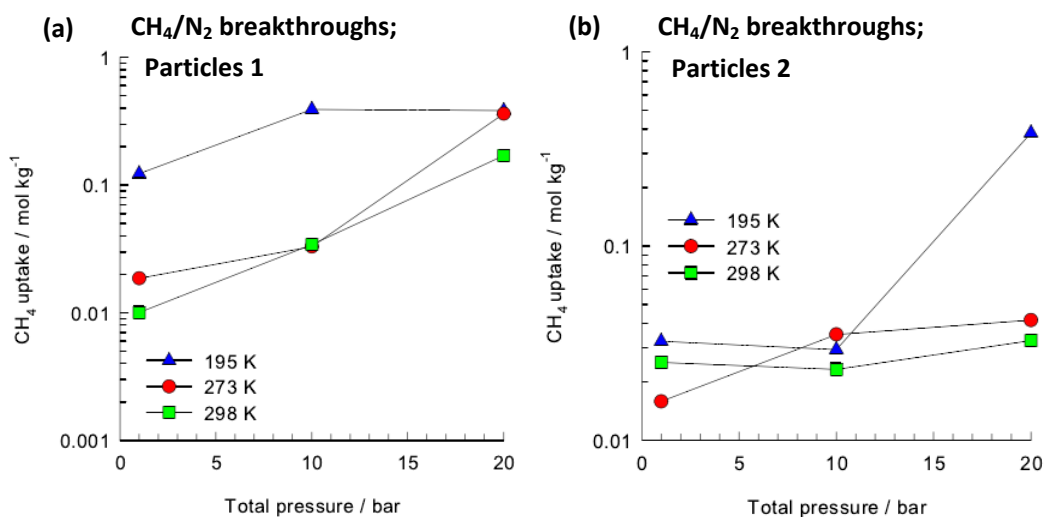

Figure S9. (a, b)  $CH_4$  uptake per kg of MOF, calculated from the experimental breakthroughs in packed bed with two particles. The x-axis is the total operating pressure.

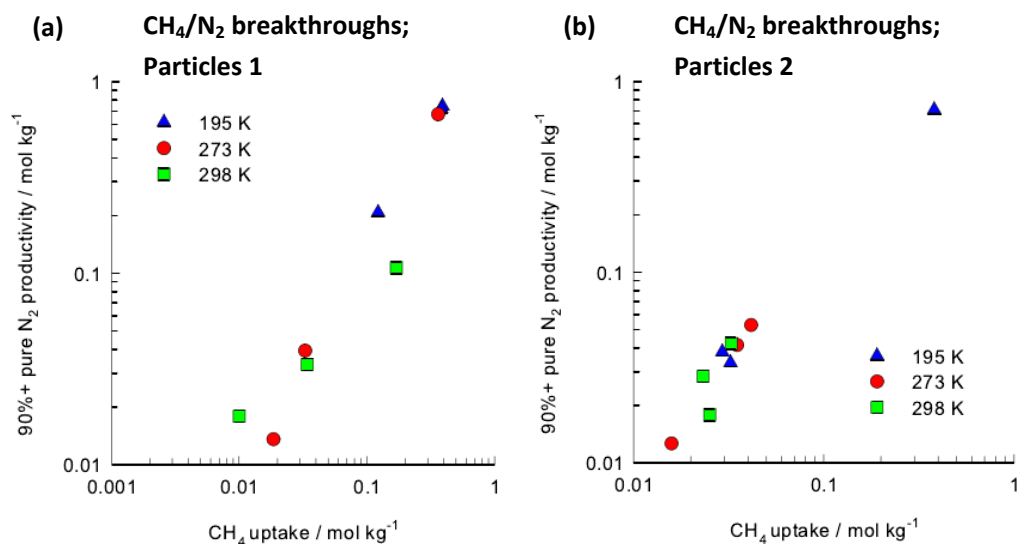

Figure S10. (a, b) Plot of productivity of 90%+ pure  $\text{N}_2$  versus the  $\text{CH}_4$  uptake in the two flexible MOFs.

## Conclusions

The important conclusion that we can be drawn from our breakthrough experiments is that both MOFs possess the capability of separation  $\text{CO}_2/\text{CH}_4$  of  $\text{CH}_4/\text{N}_2$  mixtures at pressures ranging to 20 bar, that is of relevance in industry. For each separation it is possible to obtain purified  $\text{CH}_4$  and  $\text{N}_2$ , respectively, with high productivities.

## Notation

|                  |                                                                                             |
|------------------|---------------------------------------------------------------------------------------------|
| $c_i$            | molar concentration of species $i$ in gas mixture, $\text{mol m}^{-3}$                      |
| $c_{i0}$         | molar concentration of species $i$ in gas mixture at inlet to adsorber, $\text{mol m}^{-3}$ |
| $c_t$            | total molar concentration of gas mixture, $\text{mol m}^{-3}$                               |
| $d$              | internal diameter of breakthrough tube, m                                                   |
| $L$              | length of packed bed adsorber, m                                                            |
| $m_{\text{ads}}$ | mass of adsorbent packed into the breakthrough apparatus, kg                                |
| $p_i$            | partial pressure of species $i$ in mixture, Pa                                              |
| $p_t$            | total system pressure, Pa                                                                   |
| $q_i$            | component molar loading of species $i$ , $\text{mol kg}^{-1}$                               |
| $q_t$            | total molar loading in mixture, $\text{mol kg}^{-1}$                                        |
| $q_{\text{sat}}$ | saturation loading, $\text{mol kg}^{-1}$                                                    |
| $Q_t$            | total volumetric flow rate, $\text{m}^3 \text{s}^{-1}$                                      |
| $t$              | time, s                                                                                     |
| $T$              | absolute temperature, K                                                                     |
| $V_{\text{ads}}$ | volume of adsorbent packed into the breakthrough apparatus, $\text{m}^3$                    |

## Subscripts

|     |                            |
|-----|----------------------------|
| $i$ | referring to component $i$ |
| $t$ | referring to total mixture |

6.  $\text{CO}_2/\text{CH}_4$  (50%/50%) separation cycling experiments on two particles at 298 K

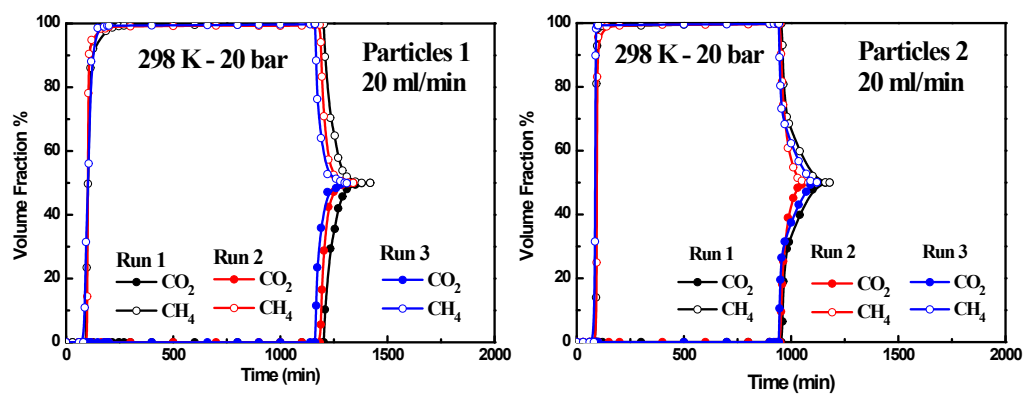

Figure S11.  $\text{CO}_2/\text{CH}_4$  (50%/50%) separation cycling experiments on two particles at 298 K.

## 7. Dynamic sorption of CO<sub>2</sub>, CH<sub>4</sub>, and N<sub>2</sub> on the two flexible MOFs

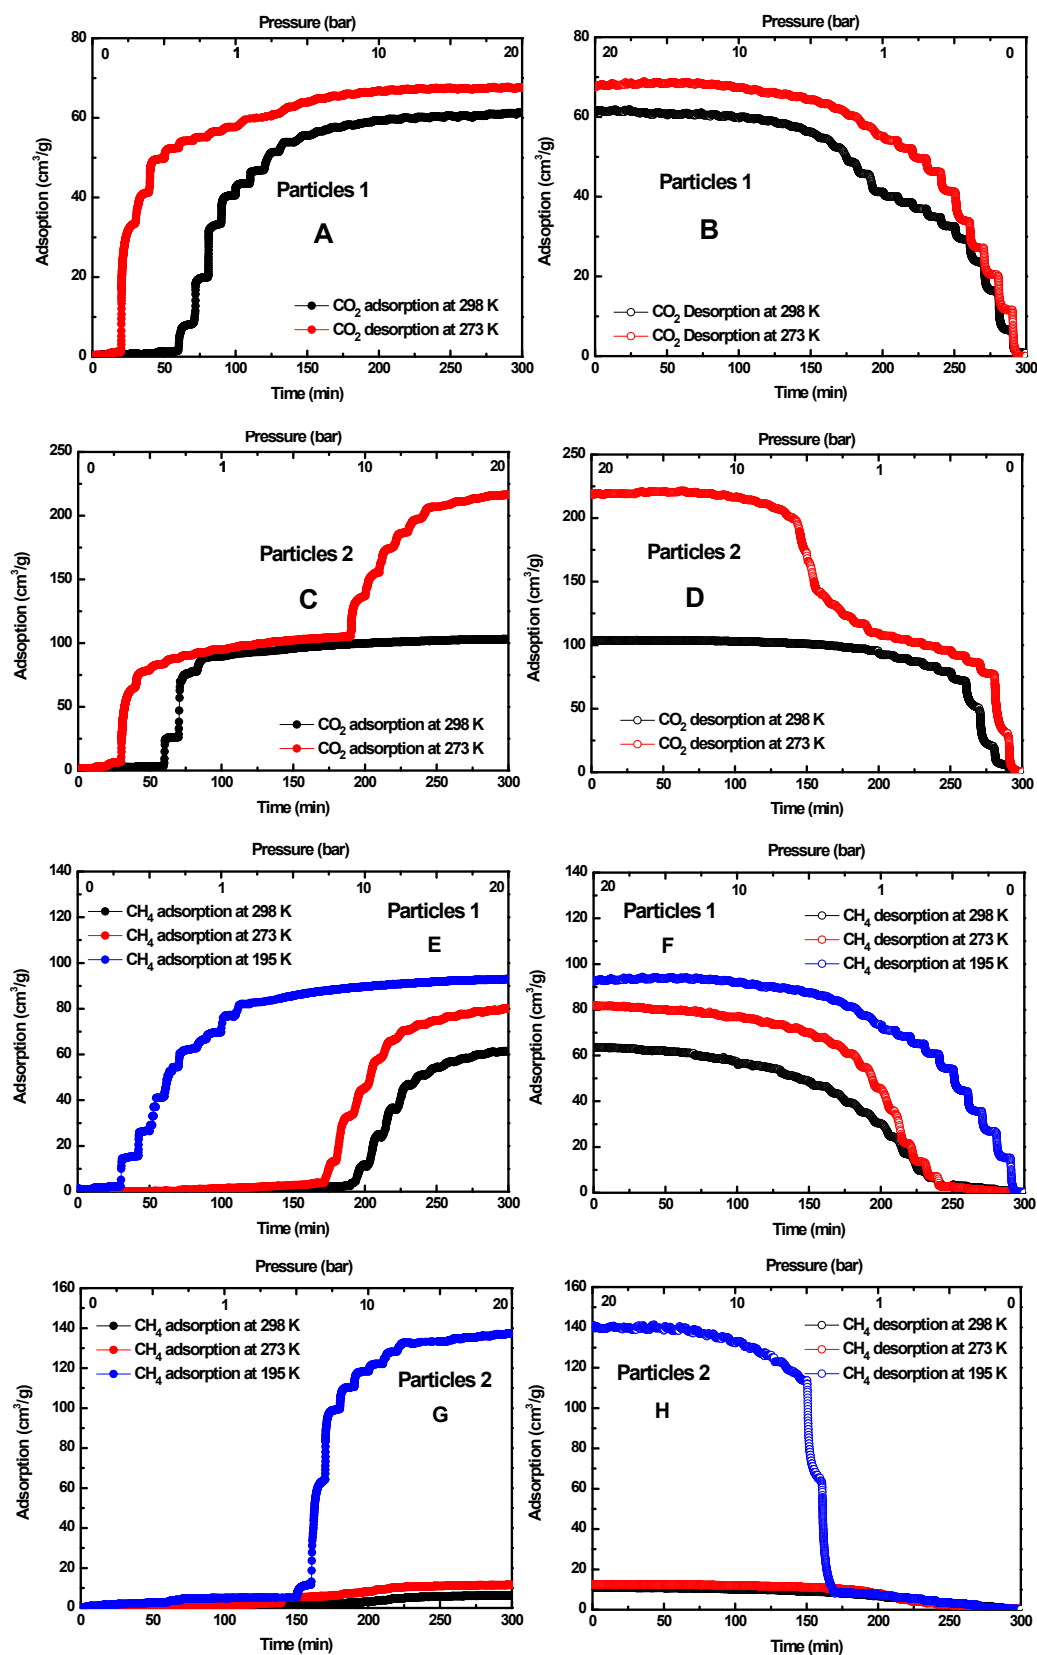

Figure S12. Dynamic CO<sub>2</sub> and CH<sub>4</sub> adsorption (filled) and desorption (opened) isotherms on particles 1 and particles 2 (298 K -195 K).

8. H<sub>2</sub>O vapor adsorption on particles 1 and 2 at 298 K with volume and structural changes

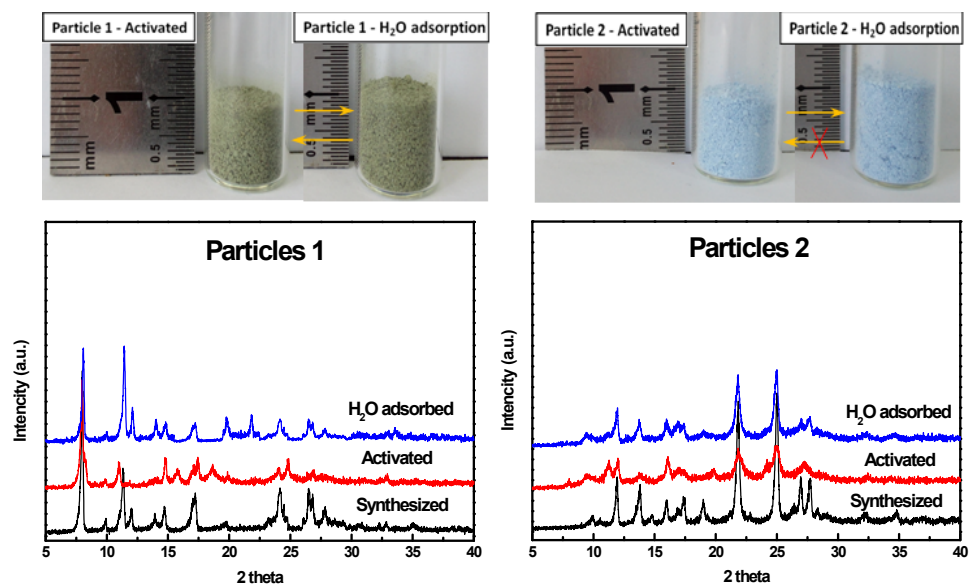

Figure S13. H<sub>2</sub>O vapor adsorption on particles 1 and 2 at 298 K with volume and structural changes.



9. Structural stability of two particles heated in air, H<sub>2</sub>O, CH<sub>3</sub>CH<sub>2</sub>OH and H<sub>2</sub>O/CH<sub>3</sub>CH<sub>2</sub>OH

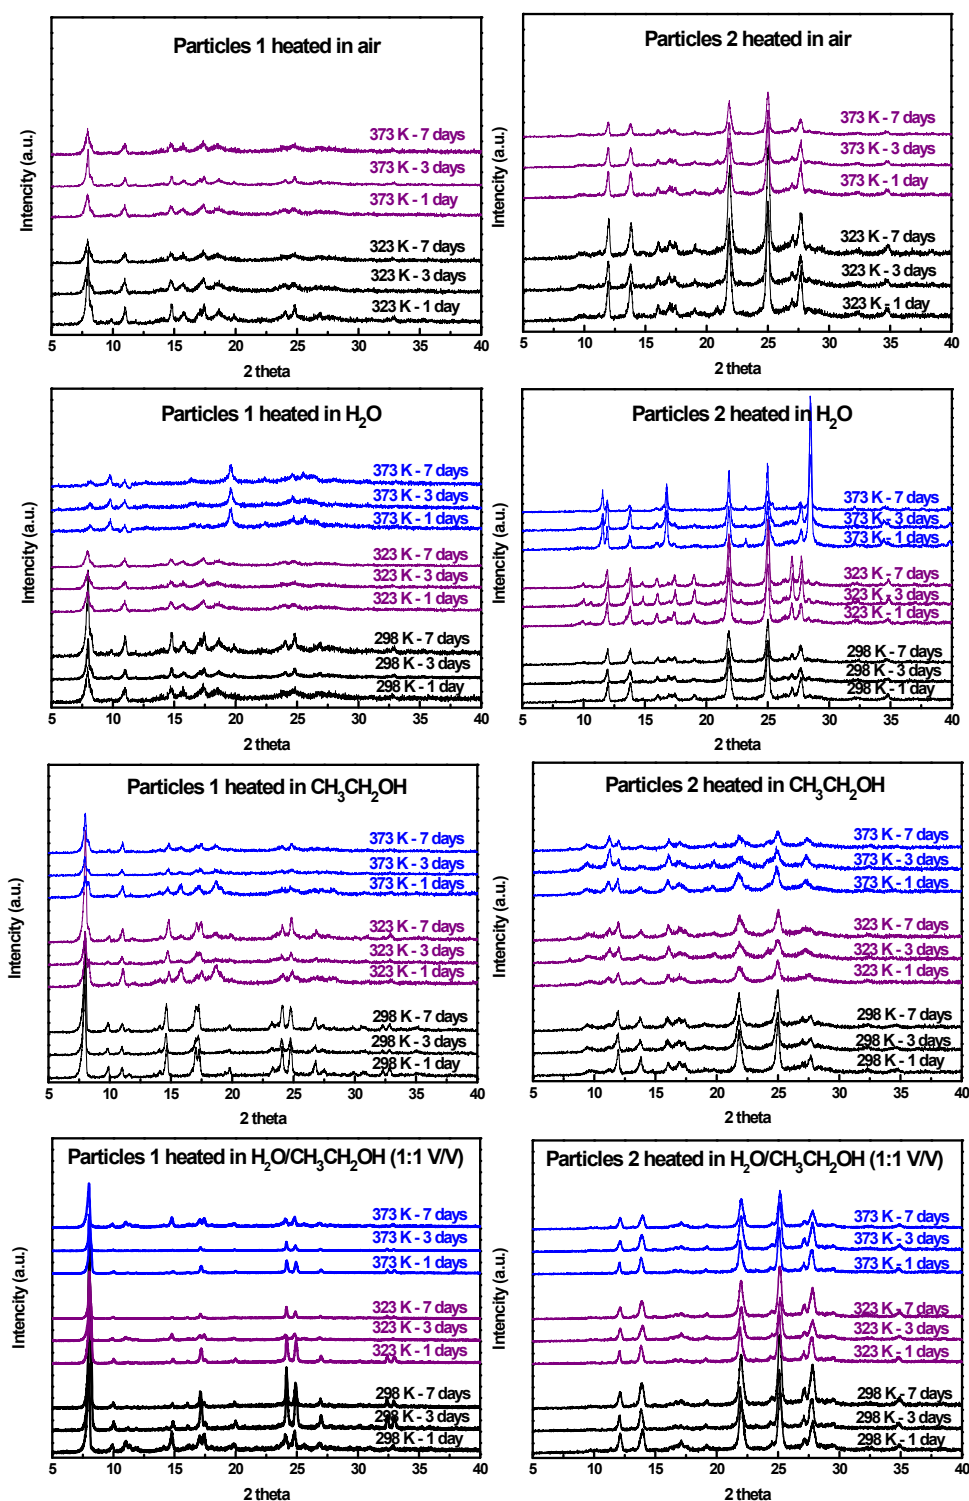

Figure S14. PXRD patterns for particles 1 and 2 heated in air, H<sub>2</sub>O, CH<sub>3</sub>CH<sub>2</sub>OH and H<sub>2</sub>O/CH<sub>3</sub>CH<sub>2</sub>OH (1:1 V/V).

Patterns were taken at day 1, 3, 7 days (bottom to top).

10. Equimolar  $\text{CO}_2/\text{CH}_4$  and  $\text{CH}_4/\text{N}_2$  co-adsorption on two flexible MOFs at 273 K

Equimolar  $\text{CO}_2/\text{CH}_4$  adsorption on  $\text{Cu}(\text{dhbc})_2(4,4'\text{-bipy})(\text{A})$  and  $\text{Cu}(4,4'\text{-bipy})_2(\text{BF}_4)_2(\text{B})$  at 273 K

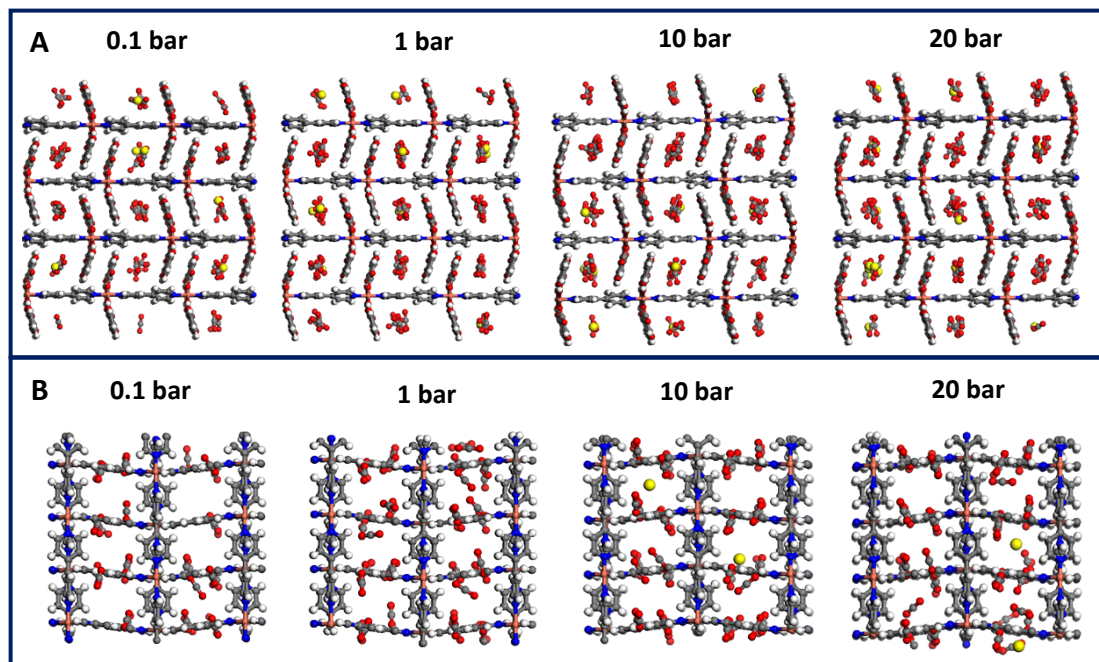

Equimolar  $\text{CH}_4/\text{N}_2$  adsorption on  $\text{Cu}(\text{dhbc})_2(4,4'\text{-bipy})(\text{C})$  and  $\text{Cu}(4,4'\text{-bipy})_2(\text{BF}_4)_2(\text{D})$  at 273 K

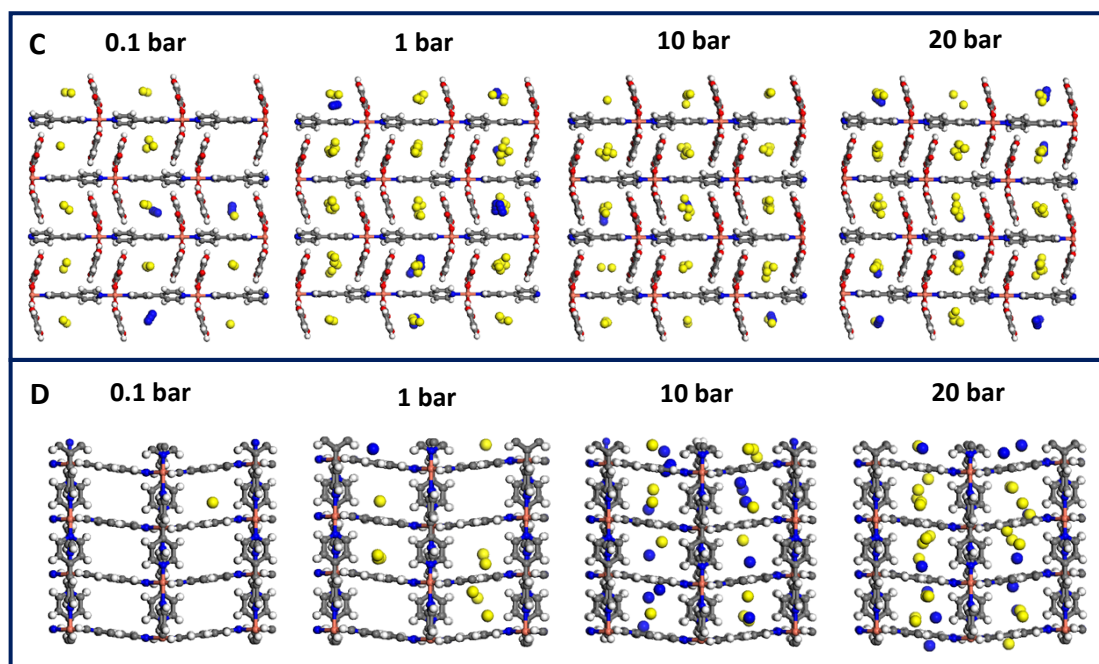

Figure S15. Equimolar  $\text{CO}_2/\text{CH}_4$  and  $\text{CH}_4/\text{N}_2$  co-adsorption on  $\text{Cu}(\text{dhbc})_2(4,4'\text{-bipy})$  and  $\text{Cu}(4,4'\text{-bipy})_2(\text{BF}_4)_2$  simulated by GCMC at 0.1, 1, 10, 20 bar and 273 K.
